# Supplementary material
Source: MDPI journal article supplement (https://www.mdpi.com/2673-401X/4/1/2)

# Exploring the Limits of Reactivity of *N*-Methyl-1,3,5-triazoline-3,5-dione with Disubstituted Bicycloalkadienes in the homo-Diels-Alder Reaction

Kenneth L. Martin <sup>1</sup>, and Gary W. Breton <sup>1,\*</sup>

## Supplementary Material

|                                                                                                                           |   |
|---------------------------------------------------------------------------------------------------------------------------|---|
| Figure S1. <sup>1</sup> H NMR (400 MHz, CDCl <sub>3</sub> ) of homo-Diels-Alder Adduct <b>11a</b> .....                   | 2 |
| Figure S2. <sup>13</sup> C{ <sup>1</sup> H} NMR (100 MHz, CDCl <sub>3</sub> ) of homo-Diels-Alder Adduct <b>11a</b> ..... | 2 |
| Figure S3. COSY Spectrum (400 MHz, CDCl <sub>3</sub> ) of homo-Diels-Alder Adduct <b>11a</b> .....                        | 3 |
| Figure S4. <sup>1</sup> H NMR (400 MHz, CDCl <sub>3</sub> ) of homo-Diels-Alder Adduct <b>12a</b> .....                   | 4 |
| Figure S5. <sup>13</sup> C{ <sup>1</sup> H} NMR (100 MHz, CDCl <sub>3</sub> ) of homo-Diels-Alder Adduct <b>12a</b> ..... | 4 |
| Figure S6. COSY Spectrum (400 MHz, CDCl <sub>3</sub> ) of homo-Diels-Alder Adduct <b>12a</b> .....                        | 5 |

**Figure S1.**  $^1\text{H}$  NMR (400 MHz,  $\text{CDCl}_3$ ) of homo-Diels-Alder Adduct **11a**

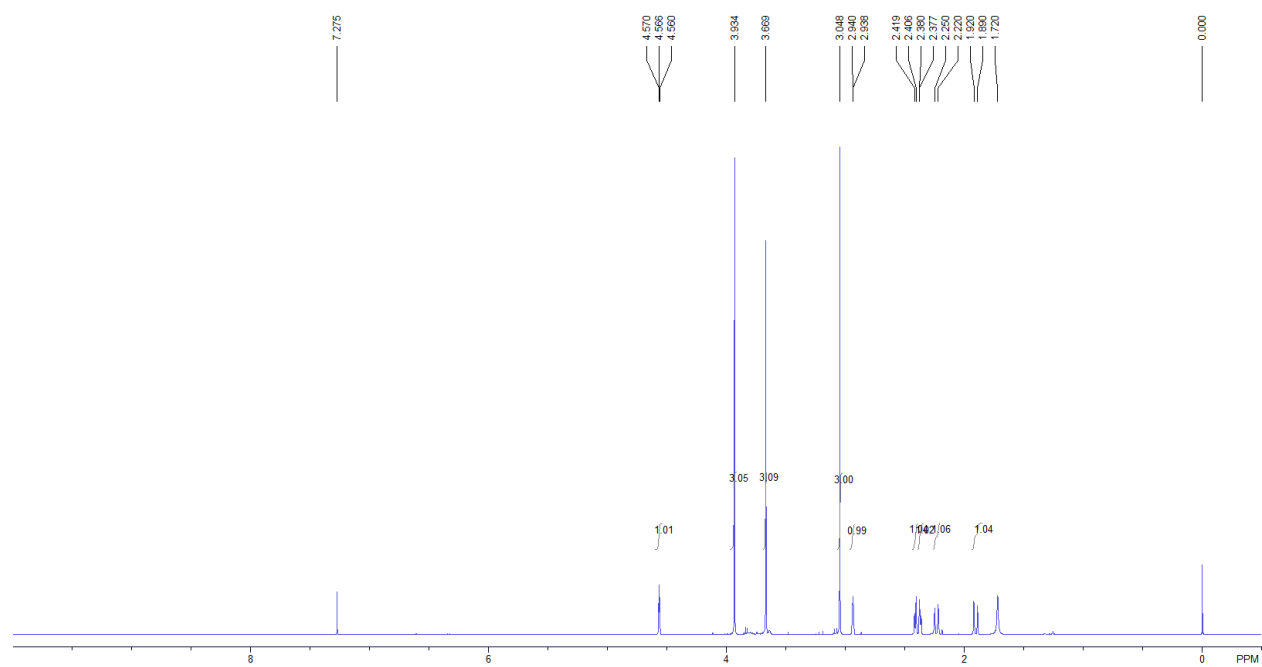

**Figure S2.**  $^{13}\text{C}\{^1\text{H}\}$  NMR (100 MHz,  $\text{CDCl}_3$ ) of homo-Diels-Alder Adduct **11a**

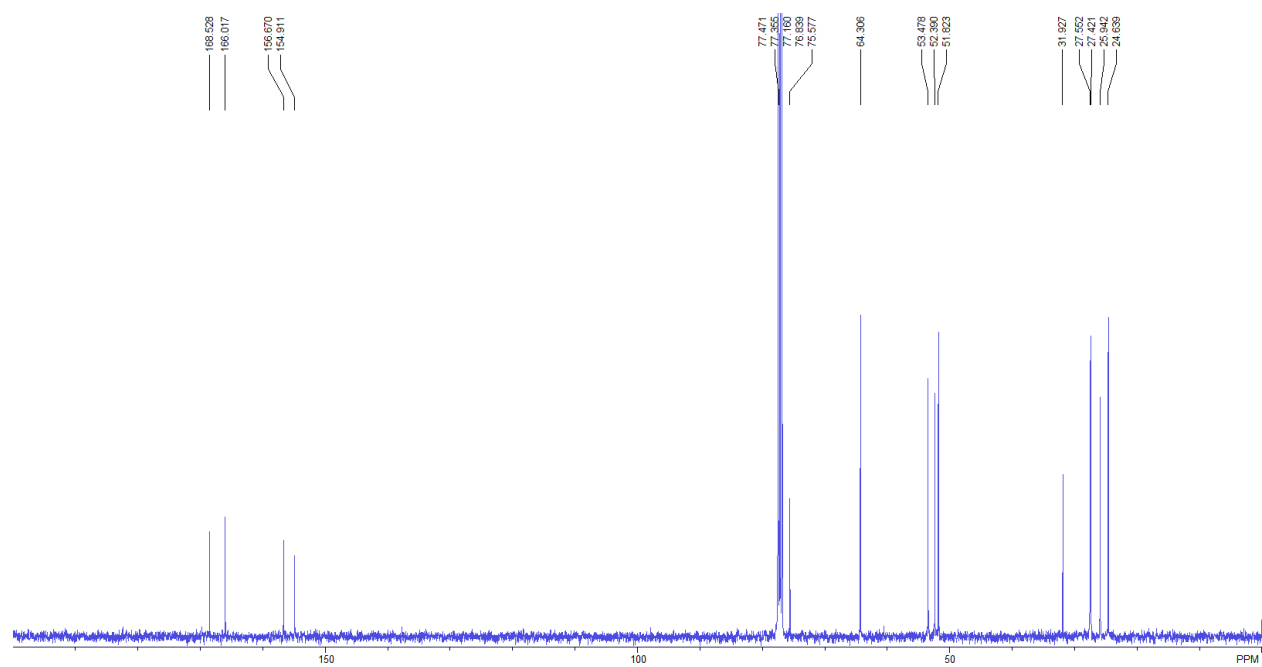

**Figure S3.** COSY Spectrum (400 MHz, CDCl<sub>3</sub>) of homo-Diels-Alder Adduct **11a**

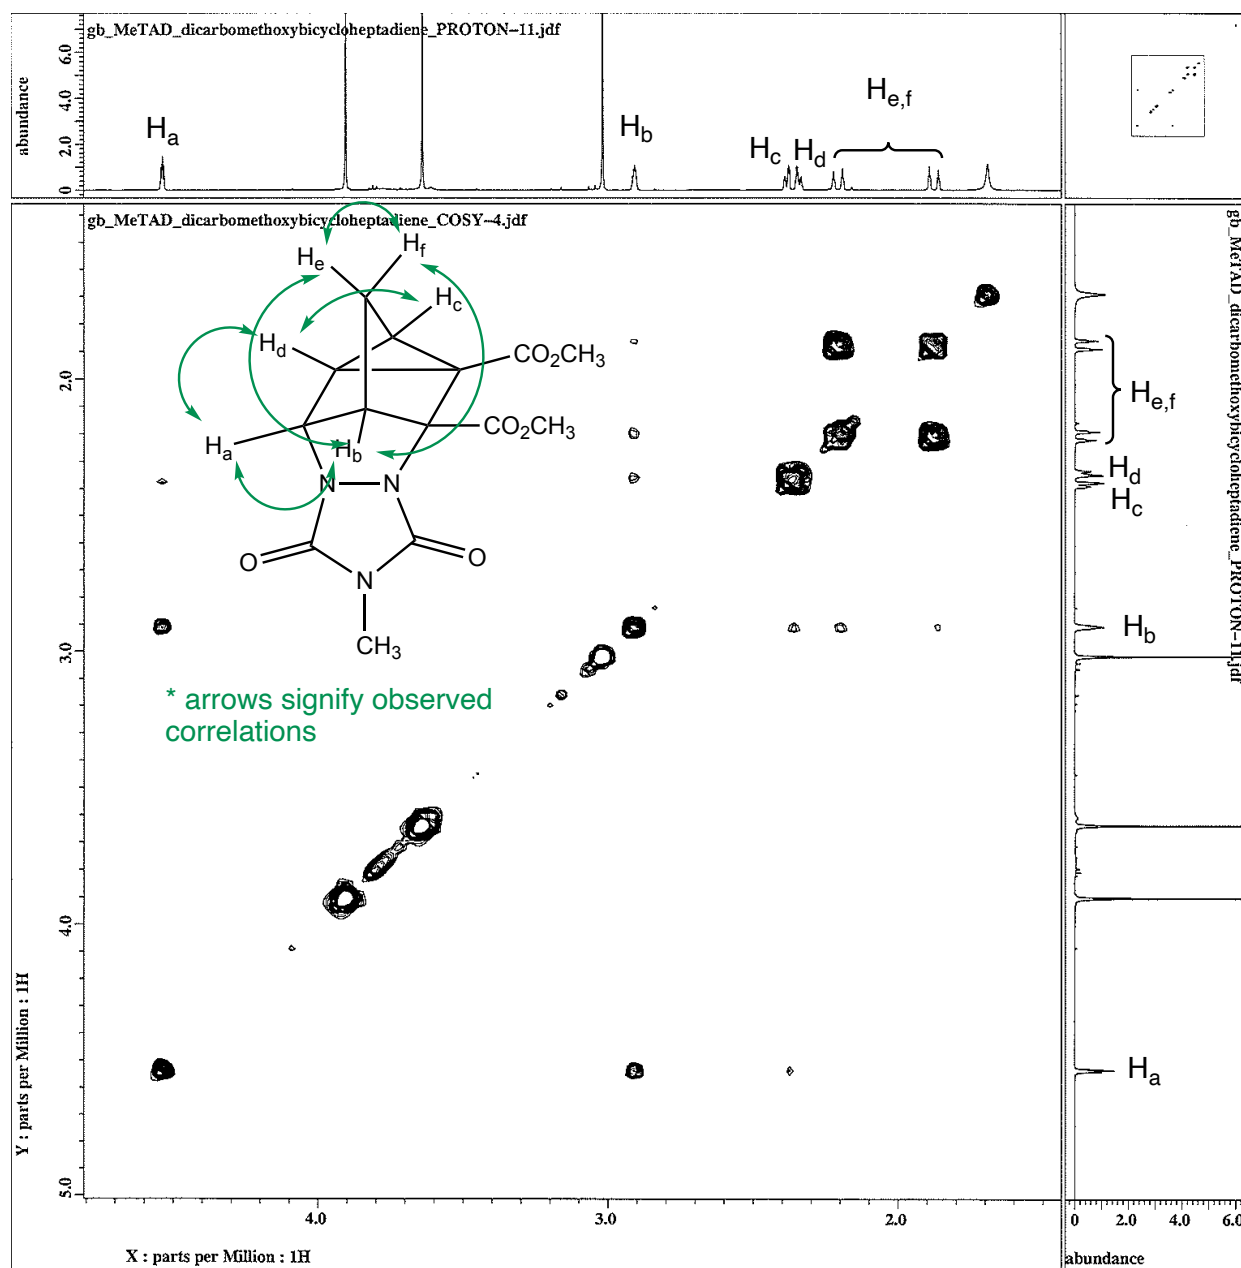

**Figure S4.**  $^1\text{H}$  NMR (400 MHz,  $\text{CDCl}_3$ ) of homo-Diels-Alder Adduct **12a**

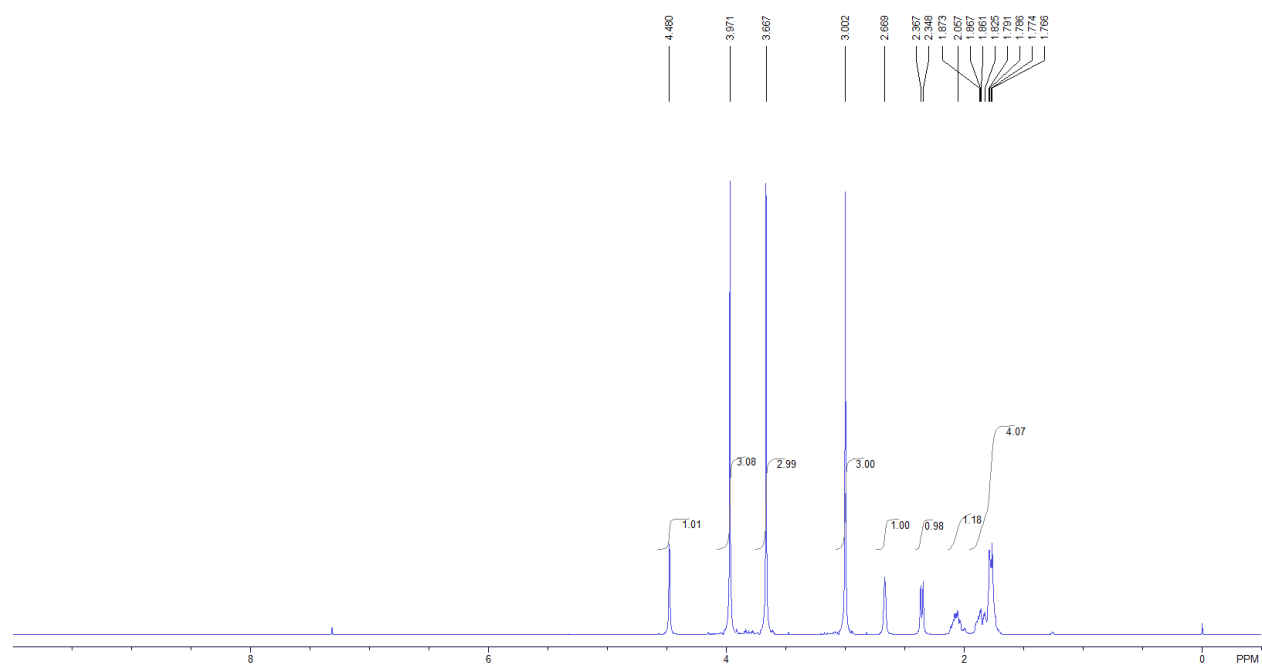

**Figure S5.**  $^{13}\text{C}\{^1\text{H}\}$  NMR (100 MHz,  $\text{CDCl}_3$ ) of homo-Diels-Alder Adduct **12a**

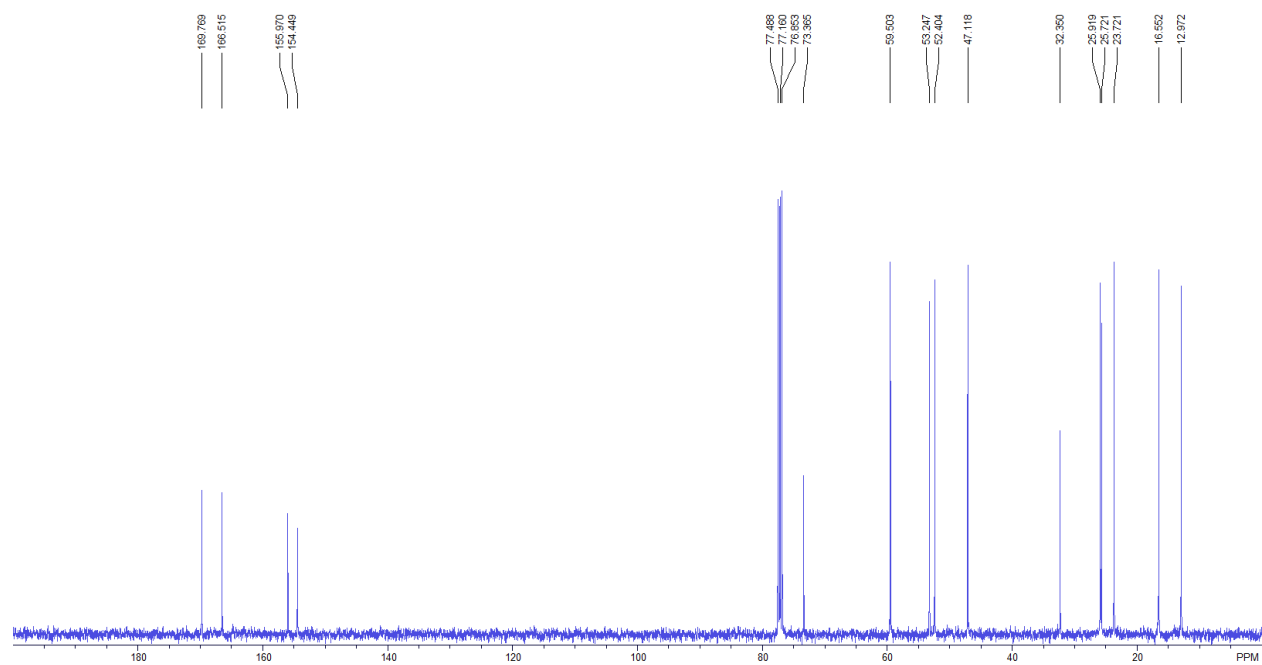

**Figure S6.** COSY Spectrum (400 MHz, CDCl<sub>3</sub>) of homo-Diels-Alder Adduct **12a**

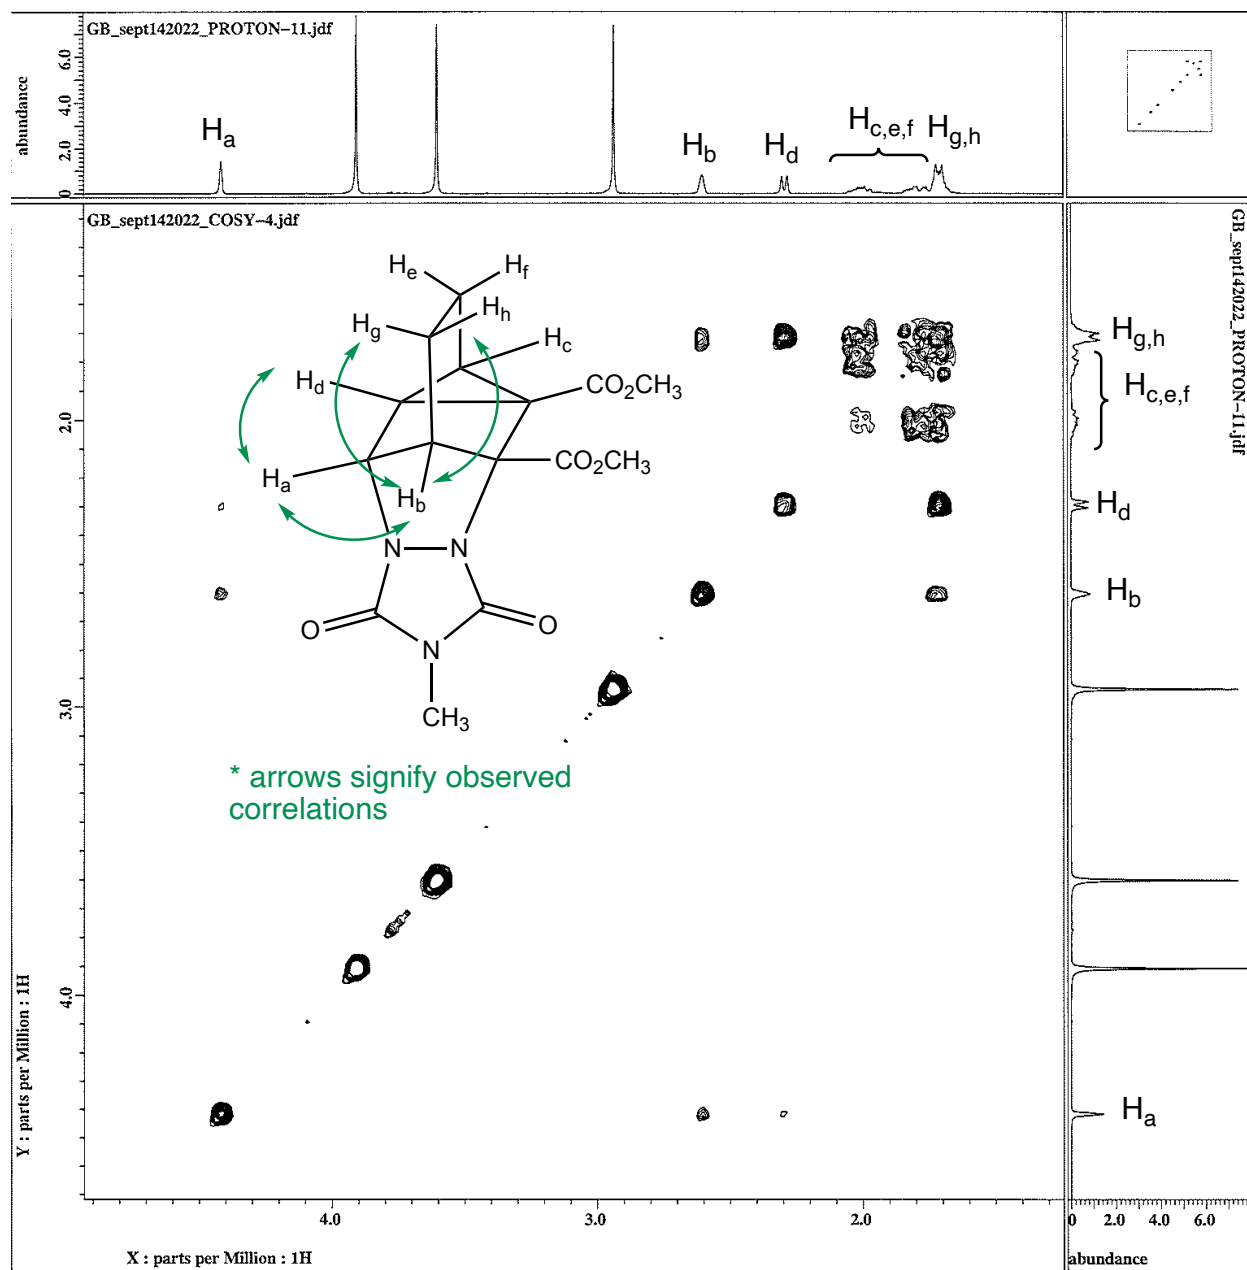

Supplement: s1 [file s1]
